# Supplementary material
Source: MDPI journal article supplement (https://www.mdpi.com/2227-7072/10/4/90)
Supplement: s1 [file s1]

## Supplementary Information

### Study Instrument

| Constructs                        | Variables   | Items                                                                                                                              |
|-----------------------------------|-------------|------------------------------------------------------------------------------------------------------------------------------------|
| <b>Initial Trust (ITR)</b>        | <b>ITR1</b> | Blockchain in banking activities seems dependable.                                                                                 |
|                                   | <b>ITR2</b> | Blockchain enabled banking seems secure                                                                                            |
|                                   | <b>ITR3</b> | Blockchain enabled banking seems reliable.                                                                                         |
|                                   | <b>ITR4</b> | Blockchain enabled banking helps the client.                                                                                       |
| <b>Usage Intention (UI)</b>       | <b>UI1</b>  | If there is access, I intend to use blockchain                                                                                     |
|                                   | <b>UI2</b>  | If there is access, I am willing to use blockchain                                                                                 |
|                                   | <b>UI3</b>  | I will use blockchain in the future                                                                                                |
| <b>Facilitating Condition(FC)</b> | <b>FC1</b>  | I have the knowledge necessary to use the blockchain technology system.                                                            |
|                                   | <b>FC2</b>  | I have the resources necessary to use the blockchain technology system                                                             |
|                                   | <b>FC3</b>  | The blockchain technology system is not compatible with other systems I had used                                                   |
|                                   | <b>FC4</b>  | A specific person (or group) is available for assistance with blockchain technology system difficulties                            |
| <b>Performance Expectancy(PE)</b> | <b>PE1</b>  | I would find blockchain technology system useful in my job.                                                                        |
|                                   | <b>PE2</b>  | Using the blockchain technology system enables me to accomplish tasks more quickly.                                                |
|                                   | <b>PE3</b>  | Using the blockchain technology system will increase my productivity                                                               |
| <b>Government Regulations(GR)</b> | <b>GR1</b>  | The current government regulations related to information technology favour the adoption of blockchain technology system.          |
|                                   | <b>GR2</b>  | The government provides knowledge building capacity for blockchain technology system adoption.                                     |
|                                   | <b>GR3</b>  | The government provides information infrastructure (laws, guidelines or policies) for the adoption of blockchain technology system |
|                                   | <b>GR4</b>  | The government promotes the adoption of blockchain technology system among banking and financial institution in India              |
| <b>Perceived Risk(PR)</b>         | <b>PR1</b>  | I feel working with blockchain interface ( Wallet) is very safe.                                                                   |
|                                   | <b>PR2</b>  | I feel Wallet (blockchain) is so secure that no one can change anything without notice.                                            |
|                                   | <b>PR3</b>  | I can access the blockchain application anytime without any problems.                                                              |
